# Supplementary material for: A Nomogram Based on Body Composition and the Prognostic Nutritional Index to Predict Early Postoperative Complications of Colorectal Cancer
Source: Research Square preprint supplement (doi:10.21203/rs.3.rs-6437397/v1), 2025-04-23
Supplement: Supplementary file 1 [file 102fc053850303259364509f.docx]

**A Nomogram Based on Body Composition and the Prognostic Nutritional Index to Predict Early Postoperative Complications of Colorectal Cancer**

**Running head:** A Nomogram to Predict Early Postoperative Complications of Colorectal Cancer

Ning Zhu,Yan Liu,Hongqing Yu,Jingya Xu,Yi Wei,Jian Zhai*

Department of Radiology,the First Affiliated Hospital of Wannan Medical College,Wuhu,China

*These authors contributed equally to this work.

**Corresponding Author:**

Jian Zhai, MD, Prof

Department of Radiology,the First Affiliated Hospital of Wannan Medical College,Wuhu,241000，China

Tel:+8613605591808

E-mail: yjszhaij@126.com

**Author contribution:**

- Conceptualization:Ning Zhu.
- Data curation: Yan Liu,Ning Zhu.
- Formal analysis: Jingya Xu,Yi Wei.
- Investigation: all authors.
- Methodology: Hongqing Yu,Ning Zhu.
- Supervision: Jian Zhai.
- Writing-original draft: Ning Zhu.
- Writing-review & editing:all authors.

**Acknowledgments:**

We would like to thank Editage (www.editage.co.kr) for English language editing.

**Funding:**

None.

**Conflicts of interest statement:**

The authors have no potential conflicts of interest to disclose.

**Ethical approval and consent to participate：**

The study was conducted in accordance with the provisions of the Declaration of Helsinki and was approved by the Institutional Review Board for Scientific Research and New Technologies on May 10, 2023. (Approval number: 2023RN (128). Because the study was retrospective, informed consent was not required.

**Data availability statement:**

The datasets generated or analyzed during the study are available from the corresponding author on reasonable request.

**Clinical trial number:**

Not applicable.
